# Supplementary material for: Mass drug administrations with dihydroartemisinin-piperaquine and single low dose primaquine to eliminate Plasmodium falciparum have only a transient impact on Plasmodium vivax: Findings from randomised controlled trials
Source: PLOS journal article supplement (doi:10.1371/journal.pone.0228190), 2020-02-05
Supplement: S2 (10.1371/journal.pone.0228190.s002) [file journal.pone.0228190.s002]

**Table S1: The coding of number of recurrent episodes in 11 scenarios, Green=uPCR negative and Red=uPCR positive**

| Scenario | PCR test result per survey<br>round 1 to 5:<br>green = negative, red =<br>positive |       |       |       |       | Interpretation:<br>Counts of positive episodes       |                                                               |
|----------|------------------------------------------------------------------------------------|-------|-------|-------|-------|------------------------------------------------------|---------------------------------------------------------------|
|          | 1                                                                                  | 2     | 3     | 4     | 5     | If each test is<br>considered as a<br>single episode | If consecutive positives are<br>considered<br>single episodes |
| 1        | Green                                                                              | Green | Green | Green | Green | 0                                                    | 0                                                             |
| 2        | Green                                                                              | Green | Red   | Green | Green | 1                                                    | 1                                                             |
| 3        | Green                                                                              | Red   | Green | Green | Red   | 2                                                    | 2                                                             |
| 4        | Green                                                                              | Red   | Red   | Green | Green | 2                                                    | 1                                                             |
| 5        | Red                                                                                | Green | Red   | Green | Red   | 3                                                    | 3                                                             |
| 6        | Red                                                                                | Red   | Green | Red   | Green | 3                                                    | 2                                                             |
| 7        | Green                                                                              | Green | Red   | Red   | Red   | 3                                                    | 1                                                             |
| 8        | Red                                                                                | Green | Red   | Red   | Red   | 4                                                    | 2                                                             |
| 9        | Red                                                                                | Red   | Green | Red   | Red   | 4                                                    | 2                                                             |
| 10       | Green                                                                              | Red   | Red   | Red   | Red   | 4                                                    | 1                                                             |
| 11       | Red                                                                                | Red   | Red   | Red   | Red   | 5                                                    | 1                                                             |
